# Supplementary material for: Knowledge of Dietitians on Gut Microbiota in Health—An Online Survey of the European Federation of the Associations of Dietitians (EFAD)
Source: MDPI journal article supplement (doi:10.3390/nu16050621), 2024-02-23
Supplement: s1 [file s1]

Supplementary Materials

# Knowledge of Dietitians on Gut Microbiota in Health—An Online Survey of the European Federation of the Associations of Dietitians (EFAD)

Evdokia K. Mitsou <sup>1,\*</sup>, Christina N. Katsagoni <sup>2,3</sup> and Katarzyna Janiszewska <sup>3</sup>

<sup>1</sup> Department of Nutrition and Dietetics, School of Health Science and Education, Harokopio University, 17671 Athens, Greece

<sup>2</sup> Department of Clinical Nutrition, Agia Sofia Children's Hospital, 11527 Athens, Greece; christina.katsagoni@gmail.com

<sup>3</sup> The European Federation of the Associations of Dietitians (EFAD), Gooimeer 4-15, 1411 DC Naarden, The Netherlands; katarzyna.janiszevska@efad.org

\* Correspondence: emitsou@hua.gr; Tel.: +30-210-9549301

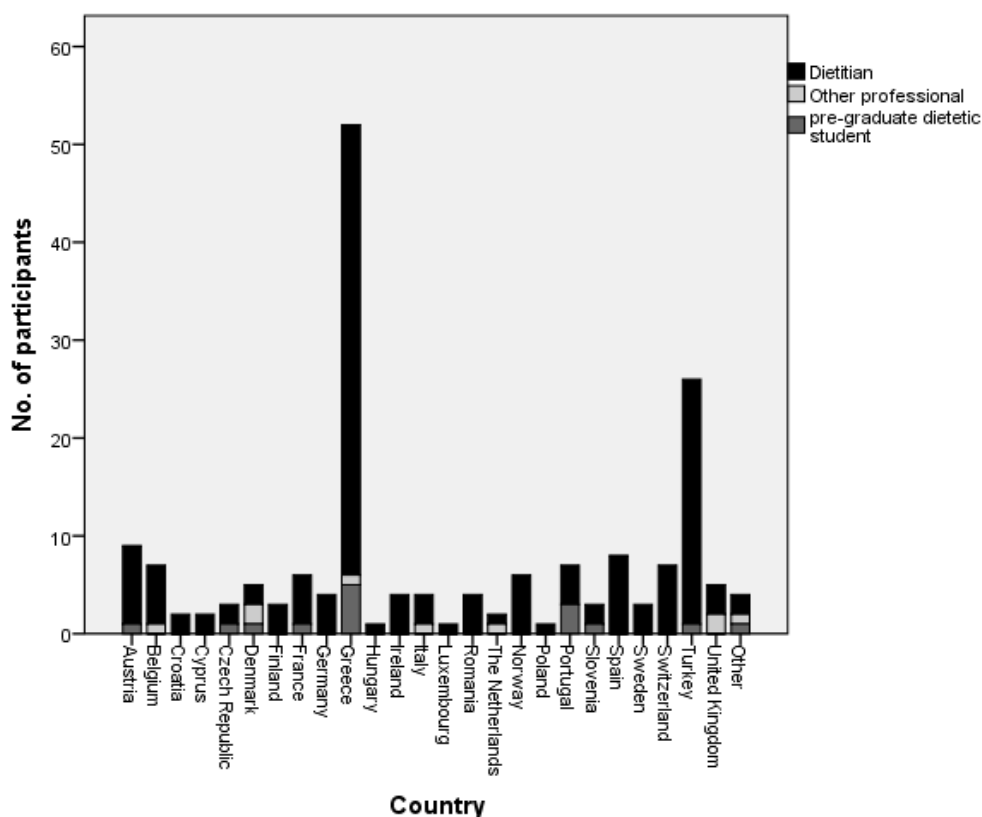

**Figure S1.** Number of participants (dietitians, pre-graduate dietetic students, other professionals) with full responses according to country origin (N=179).

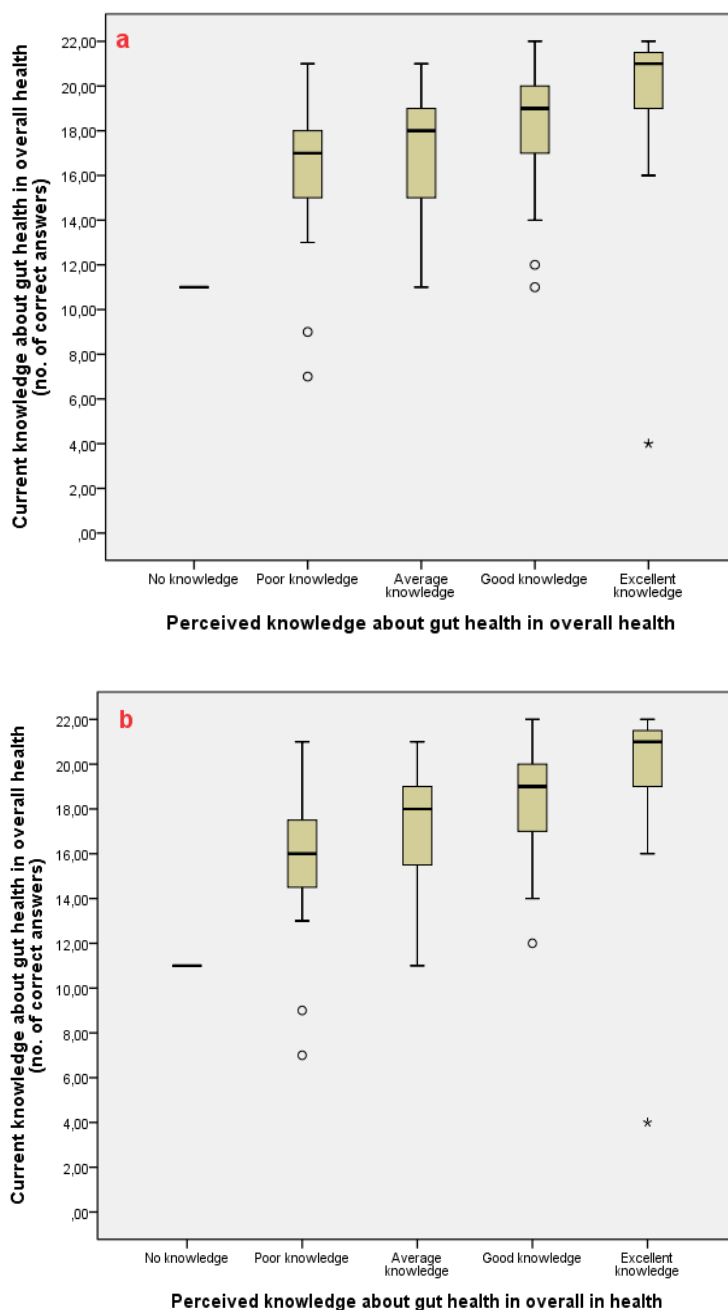

**Figure S2.** (a,b) Current knowledge score according to perceived knowledge classification about the role of gut health in overall health for (a) all participants (N=179) (Kruskal-Wallis test, overall  $p < 0.001$ ; Spearman's rho 0.353,  $p < 0.001$ ) and (b) for dietitians (n=155) (Kruskal-Wallis test, overall  $p < 0.001$ ; Spearman's rho 0.372,  $p < 0.001$ ); Score values (no. of correct responses out of 22 questions) are illustrated as boxplots.

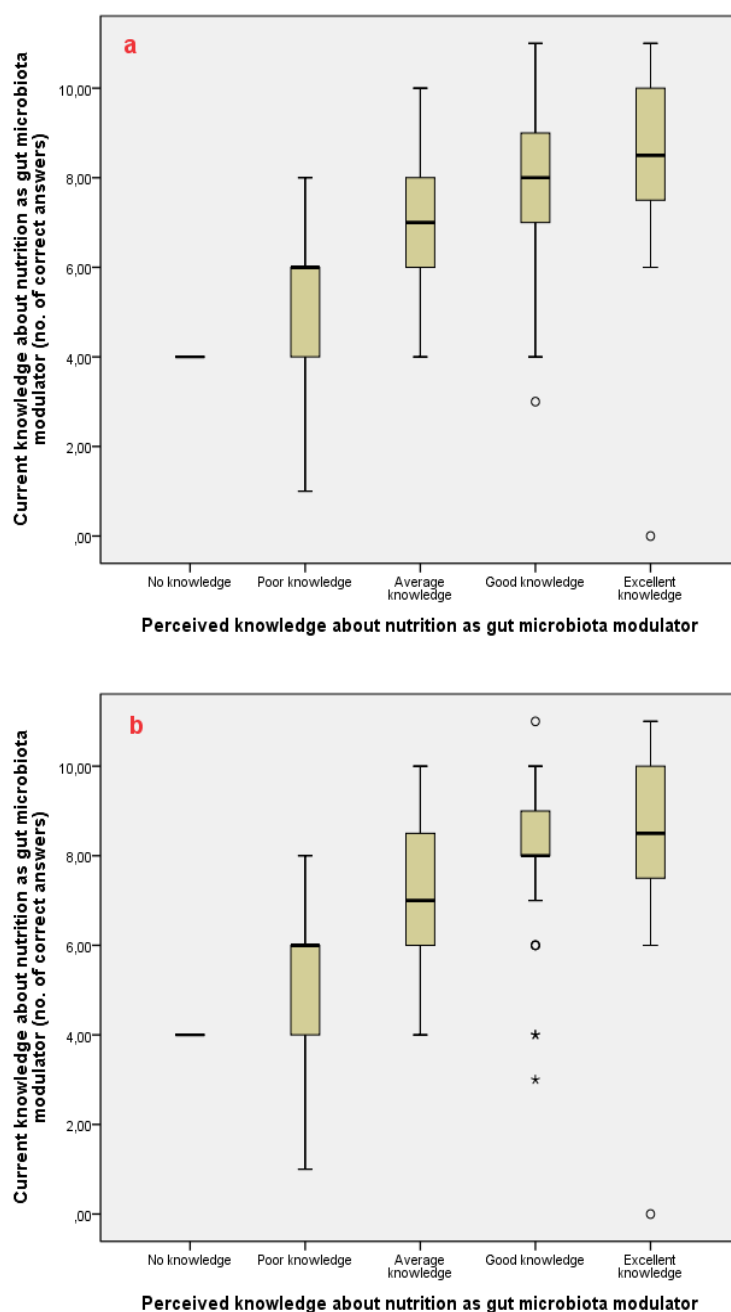

**Figure S3.** (a,b) Current knowledge score according to perceived knowledge classification about the role of nutrition as gut microbiota modulator for (a) all participants (N=179) (Kruskal-Wallis test, overall  $p < 0.001$ ; Spearman's  $\rho$  0.454,  $p < 0.001$ ) and (b) for dietitians (n=155) (Kruskal-Wallis test, overall  $p < 0.001$ ; Spearman's  $\rho$  0.447,  $p < 0.001$ ); Score values (no. of correct responses out of 11 questions) are illustrated as boxplots.

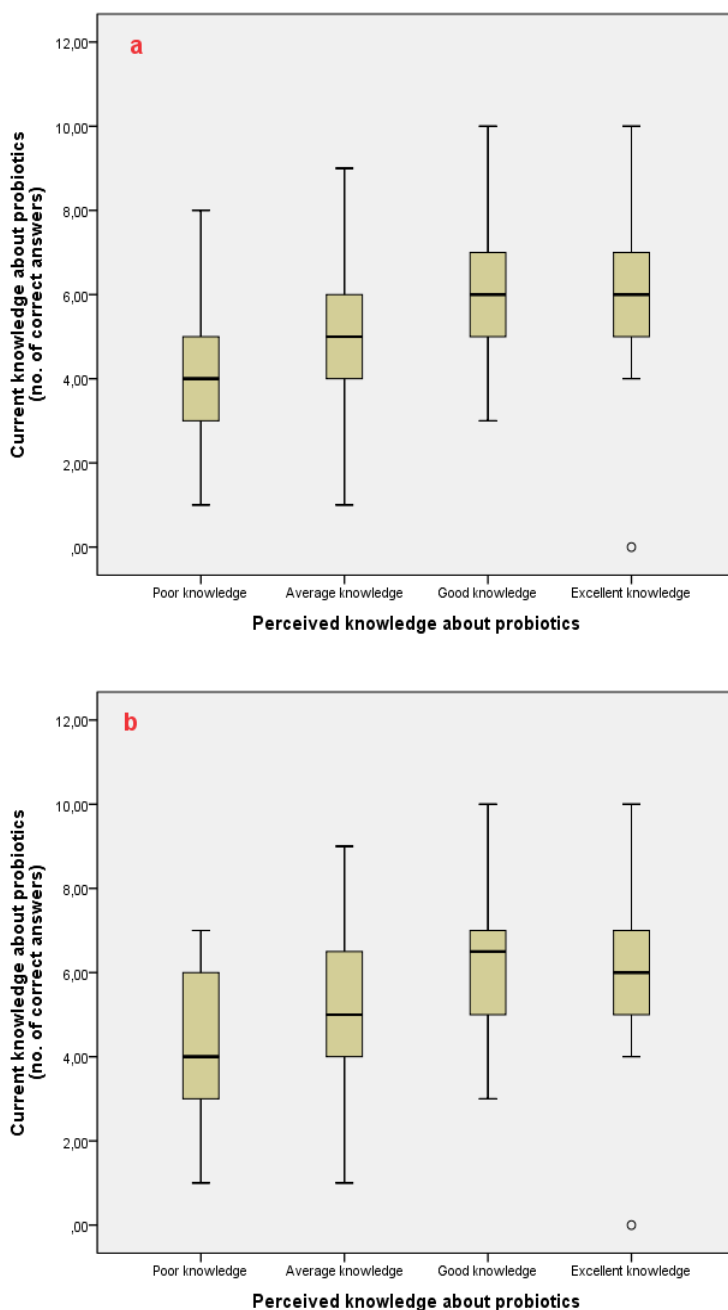

**Figure S4.** (a,b) Current knowledge score according to perceived knowledge classification about the role of probiotics in health for (a) all participants (N=179) (Kruskal-Wallis test, overall  $p < 0.001$ ; Spearman's rho 0.362,  $p < 0.001$ ) and (b) for dietitians (n=155) (Kruskal-Wallis test, overall  $p < 0.001$ ; Spearman's rho 0.361,  $p < 0.001$ ); Score values (no. of correct response out of 12 questions) are illustrated as boxplots.

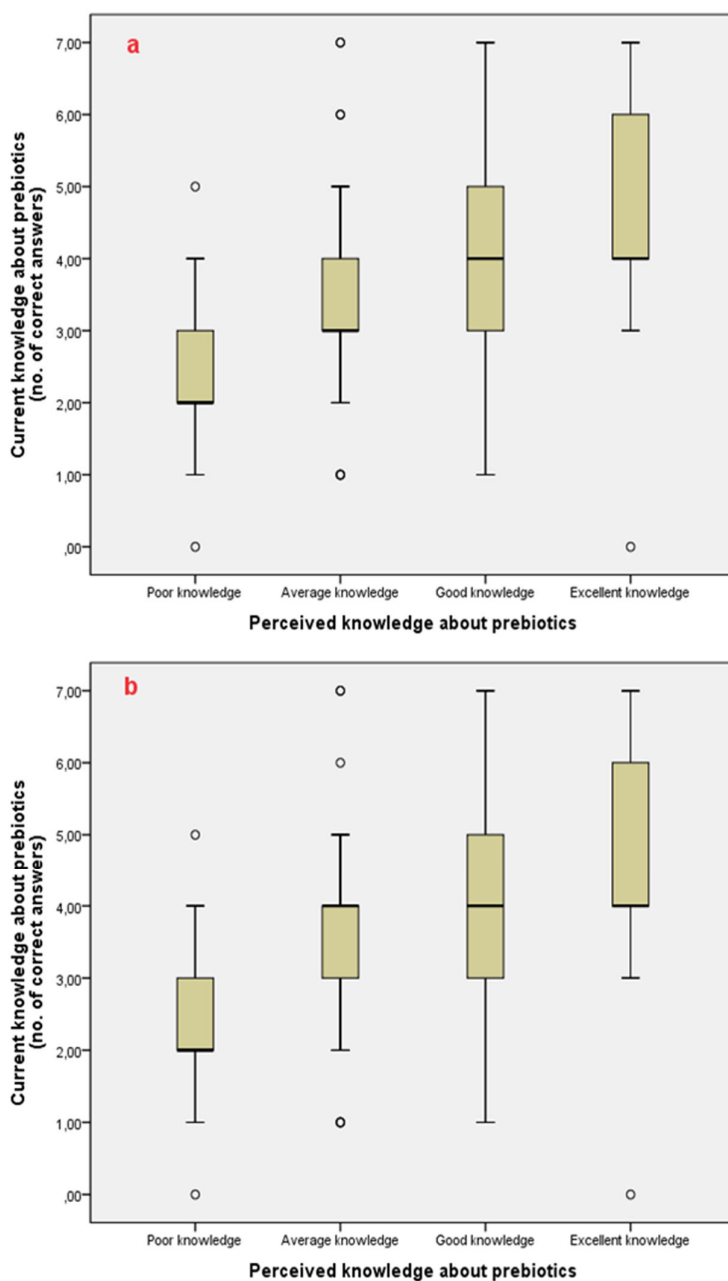

**Figure S5.** (a,b) Current knowledge score according to perceived knowledge classification about the role of prebiotics in health for (a) all participants (N=179) (Kruskal-Wallis test, overall  $p < 0.001$ ; Spearman's rho 0.351,  $p < 0.001$ ) and (b) for dietitians (n=155) (Kruskal-Wallis test, overall  $p < 0.001$ ; Spearman's rho 0.347,  $p < 0.001$ ); Score values (no. of correct response out of seven questions) are illustrated as boxplots.

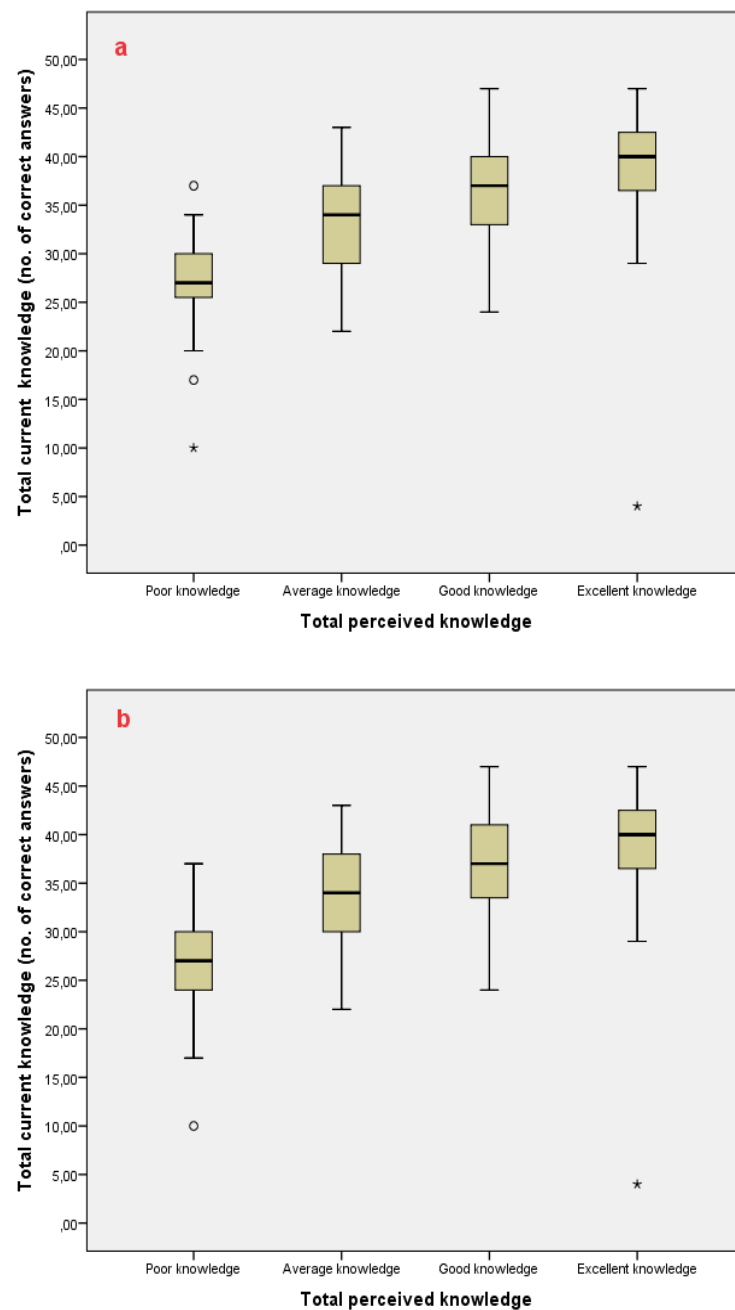

**Figure S6.** (a,b) Total current knowledge score according to overall perceived knowledge for all tested sections for (a) all participants (N=179) (Kruskal-Wallis test, overall  $p < 0.001$ ; Spearman's rho 0.459,  $p < 0.001$ ) and (b) for dietitians (n=155) (Kruskal-Wallis test, overall  $p < 0.001$ ; Spearman's rho 0.460,  $p < 0.001$ ); Score values (no. of correct responses out of 52 questions) are illustrated as boxplots.
